# Supplementary material for: mycelyso – high-throughput analysis of Streptomyces mycelium live cell imaging data
Source: PubMed Central journal article supplement (PMC6727546; doi:10.1186/s12859-019-3004-1), 2019-09-04
Supplement: 12859_2019_3004_MOESM1_ESM.pdf [file 12859_2019_3004_MOESM1_ESM.pdf]

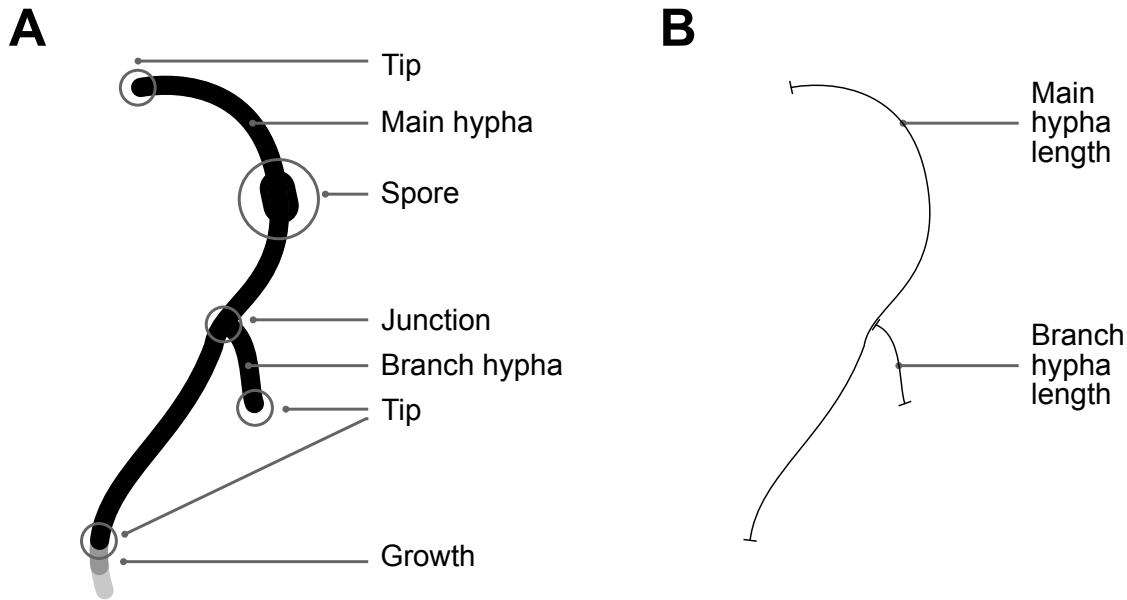

**Figure S1 Schematic representation of “microscopic” multicellular mycelium morphology. A:** Hyphal representation. Hyphal elements arise from the outgrowth of a single spore. After spore germination, the spore polarizes and forms a hypha which grows only at the tip (main hypha). During tip growth, new hyphae are formed (branch hypha), developing into simple branched networks which later form complex composite structures; **B:** Hyphal length representation.
