# Supplementary material for: mycelyso – high-throughput analysis of Streptomyces mycelium live cell imaging data
Source: PubMed Central journal article supplement (PMC6727546; doi:10.1186/s12859-019-3004-1), 2019-09-04
Supplement: 12859_2019_3004_MOESM2_ESM.pdf [file 12859_2019_3004_MOESM2_ESM.pdf]

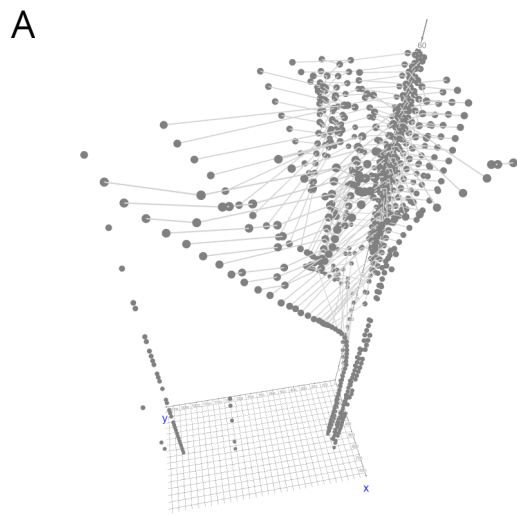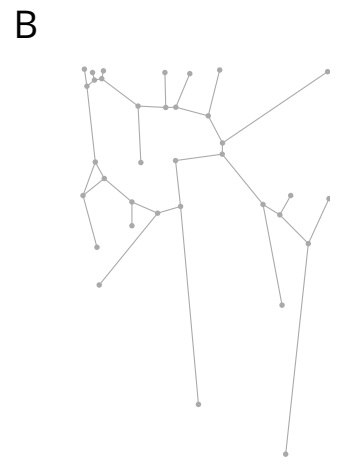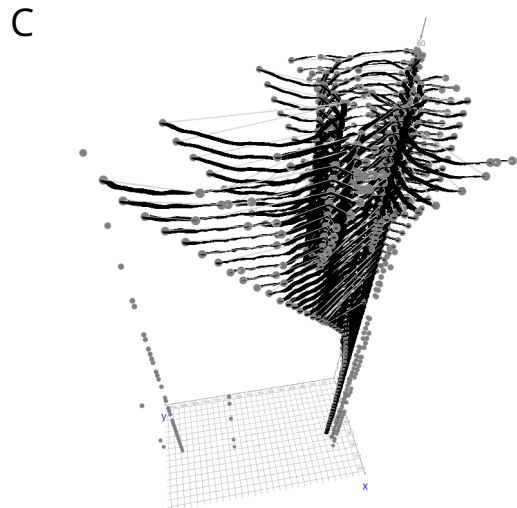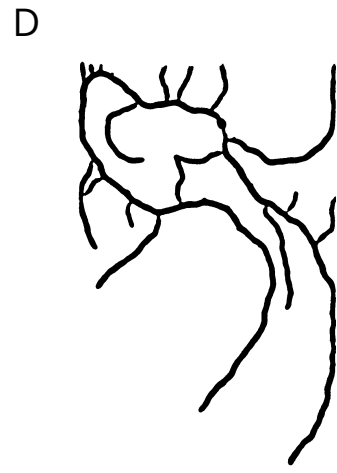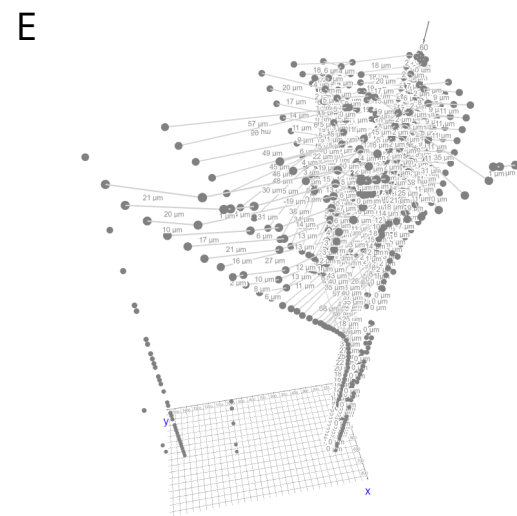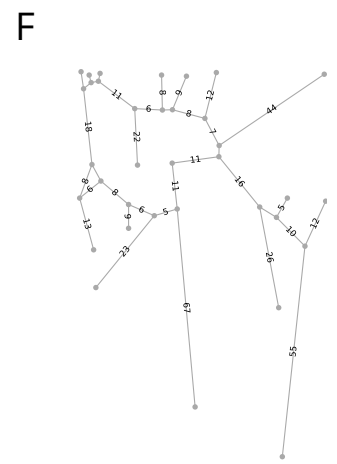

**Figure S2 *myceliso Inspector*: 3D In-Browser Visualization.** A, C, E: The time-resolved, freely rotatable graph can be inspected in 3D. x-y plane: node positions of junctions and endpoints, z-axis: time step of image stack. B, D, F: Data of last frame (top-most in A, C, E) visualized in 2D. With A, B: Track graph; C, D: Track graph with overlaid segmentations; and, E, F: Track graph with hyphae length annotations.
